# Supplementary material for: Evaluation of Anti-Thyroperoxidase (A-TPO) and Anti-Thyroglobulin (A-Tg) Antibodies in Women with Previous Hashimoto’s Thyroiditis during and after Pregnancy
Source: MDPI journal article supplement (doi:10.3390/jcm13154519), 2024-08-02
Supplement: s1 [file s1]

**Table S1 – Serum values of thyroid hormones and TSH evaluated at the first visit and after treatment of primary hypothyroidism - Pregestational**

| Case | total T3<br>ng/dL<br>nc/no | total T4<br>mg/dL<br>nc/no | FT4<br>ng/dL<br>nc/no | TSH<br>mIU/L<br>nc/no | TRAb<br>U/L<br>nc  |
|------|----------------------------|----------------------------|-----------------------|-----------------------|--------------------|
| 1    | 107/167                    | 5,6/7,4                    | 0,7/1,2               | 15/2,1                | inferior a 1,0 U/L |
| 2    | 96/140                     | 4,9/7,2                    | 0,6/1,4               | 19/1,9                | inferior a 1,0 U/L |
| 3    | 71/143                     | 4,3/8,3                    | 0,5/1,3               | 21/1,8                | inferior a 1,0 U/L |
| 4    | 121/165                    | 5,1/7,3                    | 0,7/1,4               | 16/2,2                | inferior a 1,0 U/L |
| 5    | 101/172                    | 6,8/9,1                    | 0,8/1,3               | 21/1,9                | inferior a 1,0 U/L |
| 6    | 77/98                      | 4,1/6,3                    | 0,5/1,5               | 27/2,4                | inferior a 1,0 U/L |
| 7    | 79/165                     | 5,6/9,2                    | 0,6/1,3               | 21/1,9                | inferior a 1,0 U/L |
| 8    | 82/97                      | 6,1/7,3                    | 0,7/1,5               | 18/1,8                | inferior a 1,0 U/L |
| 9    | 75/105                     | 4,9/8,3                    | 0,4/1,5               | 29/2,1                | inferior a 1,0 U/L |
| 10   | 83/123                     | 4,3/7,8                    | 0,5/1,4               | 21/2,1                | inferior a 1,0 U/L |
| 11   | 74/98                      | 4,1/6,9                    | 0,5/1,3               | 25/1,9                | inferior a 1,0 U/L |
| 12   | 71/152                     | 4,9/8,3                    | 0,7/1,2               | 19/2,0                | inferior a 1,0 U/L |
| 13   | 68/162                     | 4,1/9,3                    | 0,3/1,4               | 35/1,8                | inferior a 1,0 U/L |
| 14   | 79/143                     | 5,3/8,9                    | 0,7/1,6               | 19/1,3                | inferior a 1,0 U/L |
| 15   | 71/101                     | 4,9/8,3                    | 0,6/1,4               | 18/1,2                | inferior a 1,0 U/L |
| 16   | 90/147                     | 5,3/7,4                    | 0,7/1,3               | 23/2,4                | inferior a 1,0 U/L |
| 17   | 102/176                    | 6,2/8,3                    | 0,5/1,1               | 27/1,9                | inferior a 1,0 U/L |
| 18   | 128/189                    | 6,9/9,3                    | 0,7/1,2               | 19/2,1                | inferior a 1,0 U/L |
| 19   | 74/165                     | 4,9/7,1                    | 0,5/1,4               | 28/2,1                | inferior a 1,0 U/L |
| 20   | 76/162                     | 5,3/7,3                    | 0,7/1,3               | 27/1,2                | inferior a 1,0 U/L |
| 21   | 65/142                     | 3,9/8,3                    | 0,3/1,2               | 39/1,9                | inferior a 1,0 U/L |
| 22   | 79/151                     | 4,5/9/7                    | 0,5/1,1               | 26/1,2                | inferior a 1,0 U/L |
| 23   | 80/149                     | 4,2/8,5                    | 0,6/1,5               | 25/0,9                | inferior a 1,0 U/L |
| 24   | 93/161                     | 5,1/9/8                    | 0,5/1,3               | 27/1,1                | inferior a 1,0 U/L |
| 25   | 76/143                     | 4,7/7,4                    | 0,7/1,1               | 19/1,7                | inferior a 1,0 U/L |
| 26   | 71/192                     | 4,2/9/8                    | 0,6/1,2               | 25/1,1                | inferior a 1,0 U/L |
| 27   | 69/169                     | 4,6/8,3                    | 0,3/1,4               | 41/2,4                | inferior a 1,0 U/L |
| 28   | 102/168                    | 7,3/9,4                    | 0,6/1,1               | 31/1,3                | inferior a 1,0 U/L |
| 29   | 74/167                     | 7,4/9,1                    | 0,7/1,4               | 28/0,9                | inferior a 1,0 U/L |
| 30   | 75/145                     | 6,9/8,9                    | 0,6/1,3               | 27/1,0                | inferior a 1,0 U/L |

nc= first visit

no= after treatment

Reference values: total triiodothyronine (total T3):70 to 200 ng/dL; total thyroxine (total T4): 4.5 to 12.0 µg/dL; Free T4: 0.9 to 1.7 ng/dL; thyroid-stimulating hormone (TSH): 0.45 to 4.5 mIU/L; anti-TSH receptor antibody (anti-TSHR or TRAb); positive greater than 1.5 U/L and normal less than 1.0 U/L

Table S2- Serum values of thyroid hormones and TSH evaluated in the first trimester (n1), second trimester (n2), third trimester (n3) of gestation and after 3 months of the Postgestational period (n4) and TRAb at the first visit and after 3 months of the Postgestational period (n4).

| Case | T4 libre<br>média ng/ dL<br>n1/n2/n3/n4 | TSH<br>média mUI/ L<br>n1/n2/n3/n4 | TRAb nc<br>média U/L<br>n4 | T3<br>média ng/dL<br>total n4 |
|------|-----------------------------------------|------------------------------------|----------------------------|-------------------------------|
| 1    | 1,1/1,0/1,2/1,3                         | 0,9/1,2/1,5/2,1                    | inferior a 1,0             | 123                           |
| 2    | 1,0/1,1/1,0/1,2                         | 2,0/2,1/1,2/1,3                    | inferior a 1,0             | 94                            |
| 3    | 1,3/1,1/1,0/1,2                         | 1,4/1,8/2,1/1,9                    | inferior a 1,0             | 163                           |
| 4    | 1,0/1,1/1,0/1,2                         | 1,2/0,8/1,1/2,5                    | inferior a 1,0             | 143                           |
| 5    | 1,3/1,2/1,0/1,5                         | 0,9/1,9/2,1/2,9                    | inferior a 1,0             | 89                            |
| 6    | 1,4/1,1/1,0/1,1                         | 1,9/2,0/2,1/1,2                    | inferior a 1,0             | 104                           |
| 7    | 1,1/1,3/1,2/1,4                         | 1,2/1,9/0,9/2,8                    | inferior a 1,0             | 99                            |
| 8    | 1,0/1,2/1,0/1,3                         | 1,1/1,2/2,0/2,1                    | inferior a 1,0             | 178                           |
| 9    | 1,3/1,1/1,0/1,6                         | 1,0/0,9/2,2/2,9                    | inferior a 1,0             | 156                           |
| 10   | 1,1/1,0/1,2/1,1                         | 1,1/1,9/2,0/1,1                    | inferior a 1,0             | 143                           |
| 11   | 1,2/1,1/1,0/1,6                         | 1,0/1,1/2,1/2,9                    | inferior a 1,0             | 89                            |
| 12   | 1,0/1,1/1,1/1,4                         | 0,8/0,9/1,3/1,9                    | inferior a 1,0             | 91                            |
| 13   | 1,4/1,1/1,1/1,5                         | 1,1/1,9/2,0/2,9                    | inferior a 1,0             | 175                           |
| 14   | 1,2/1,1/1,0/1,5                         | 0,7/0,9/1,1/1,2                    | inferior a 1,0             | 102                           |
| 15   | 1,1/1,0/1,2/1,6                         | 1,1/1,8/2,6/2,1                    | inferior a 1,0             | 109                           |
| 16   | 1,0/1,1/1,0/1,3                         | 1,0/1,1/1,3/2,1                    | inferior a 1,0             | 92                            |
| 17   | 1,3/1,1/1,0/1,2                         | 0,9/0,8/1,2/1,1                    | inferior a 1,0             | 89                            |
| 18   | 1,2/1,1/1,0/1,3                         | 1,9/1,3/1,1/1,7                    | inferior a 1,0             | 172                           |
| 19   | 1,4/1,2/1,0/1,4                         | 1,0/1,1/1,2/2,0                    | inferior a 1,0             | 153                           |
| 20   | 1,1/1,0/1,1/1,3                         | 0,9/1,0/2,1/2,9                    | inferior a 1,0             | 149                           |
| 21   | 1,0/1,1/1,1/1,6                         | 1,0/1,1/2,1/2,2                    | inferior a 1,0             | 155                           |
| 22   | 1,1/1,0/1,1/1,6                         | 1,6/2,1/2,5/2,9                    | inferior a 1,0             | 90                            |
| 23   | 1,0/1,0/1,1/1,2                         | 1,1/0,9/1,2/2,2                    | inferior a 1,0             | 98                            |
| 24   | 1,1/1,2/1,0/1,4                         | 0,8/2,2/2,1/2,8                    | inferior a 1,0             | 86                            |
| 25   | 1,0/1,0/1,1/1,3                         | 1,2/1,1/1,9/2,0                    | inferior a 1,0             | 163                           |
| 26   | 1,1/1,0/1,0/1,2                         | 1,1/1,0/0,9/2,9                    | inferior a 1,0             | 162                           |
| 27   | 1,0/1,1/1,1/1,4                         | 1,0/0,9/2,1/2,9                    | inferior a 1,0             | 179                           |
| 28   | 1,0/1,3/1,1/1,5                         | 0,8/1,0/1,1/2,4                    | inferior a 1,0             | 97                            |
| 29   | 1,1/1,1/1,0/1,2                         | 1,0/2,1/2,5/2,1                    | inferior a 1,0             | 142                           |
| 30   | 1,2/1,1/1,0/1,3                         | 0,9/1,2/1,7/2,8                    | inferior a 1,0             | 155                           |

nc= first visit

n1 - first trimester

n2 - second trimester

n3 - third trimester of gestation

n4 - Postgestational

Reference values: FT4 (free T4): n1: 0.9 to 1.5; n2: 0.7 to 1.3; n3: 0.6 to 1.2; n4: 0.9 to 1.7 ng/dL;

thyroid stimulating hormone (TSH): n1: 0.1-2.5; n2: 0.2-3.5; n3: 0.3-3.5; n4: 0.45 to 4.5 mIU/L; anti-TSH receptor antibody (anti-TSHR or TRAb): positive greater than 1.5 U/L and normal less than 1.0 U/L : total triiodothyronine (total T3): 70 to 200 ng/dL

Table S3- Serum values of antithyroid antibodies A-TPO and A-Tg evaluated Pregestational in the three trimesters of gestation and three months Postgestational

| Cases | A-TPO - IU/mL   |                           |                            |                           |                           | A-Tg - IU/mL    |                           |                            |                           |                           |
|-------|-----------------|---------------------------|----------------------------|---------------------------|---------------------------|-----------------|---------------------------|----------------------------|---------------------------|---------------------------|
|       | Pre gestational | First trimester (average) | Second trimester (average) | Third trimester (average) | 3 months Post gestational | Pre gestational | First trimester (average) | Second trimester (average) | Third trimester (average) | 3 months Post gestational |
| 1     | 1000            | 916                       | 282                        | 40                        | 819                       | 600             | 420                       | 20                         | 20                        | 50                        |
| 2     | 645             | 43                        | 30                         | 20                        | 540                       | 343             | 15                        | 12                         | 19                        | 414                       |
| 3     | 935             | 452                       | 32                         | 23                        | 1000                      | 452             | 43                        | 21                         | 9                         | 642                       |
| 4     | 215             | 116                       | 106                        | 94                        | 343                       | 171             | 34                        | 22                         | 28                        | 215                       |
| 5     | 937             | 251                       | 21                         | 8                         | 892                       | 248             | 192                       | 32                         | 29                        | 362                       |
| 6     | 3000            | 312                       | 102                        | 43                        | 1000                      | 390             | 103                       | 34                         | 19                        | 638                       |
| 7     | 3029            | 164                       | 121                        | 125                       | 1600                      | 116             | 56                        | 45                         | 56                        | 128                       |
| 8     | 734             | 123                       | 34                         | 5                         | 897                       | 870             | 18                        | 24                         | 12                        | 678                       |
| 9     | 3000            | 234                       | 19                         | 12                        | 1000                      | 435             | 231                       | 13                         | 9                         | 546                       |
| 10    | 479             | 121                       | 65                         | 16                        | 569                       | 198             | 32                        | 12                         | 5                         | 768                       |
| 11    | 3000            | 234                       | 34                         | 25                        | 980                       | 345             | 132                       | 23                         | 19                        | 569                       |
| 12    | 868             | 231                       | 127                        | 57                        | 1000                      | 662             | 158                       | 48                         | 35                        | 1000                      |
| 13    | 540             | 522                       | 90                         | 66                        | 980                       | 1300            | 188                       | 288                        | 187                       | 1000                      |
| 14    | 446             | 101                       | 26                         | 26                        | 408                       | 236             | 200                       | 20                         | 20                        | 455                       |
| 15    | 448             | 137                       | 72                         | 18                        | 740                       | 223             | 42                        | 40                         | 39                        | 540                       |
| 16    | 1000            | 54                        | 54                         | 29                        | 1000                      | 2600            | 210                       | 120                        | 32                        | 600                       |
| 17    | 254             | 132                       | 94                         | 30                        | 540                       | 152             | 60                        | 34                         | 14                        | 270                       |
| 18    | 211             | 164                       | 127                        | 54                        | 388                       | 220             | 115                       | 70                         | 30                        | 23                        |
| 19    | 3000            | 98                        | 45                         | 29                        | 768                       | 345             | 121                       | 89                         | 23                        | 456                       |
| 20    | 1000            | 534                       | 15                         | 14                        | 1000                      | 458             | 408                       | 61                         | 49                        | 540                       |
| 21    | 600             | 254                       | 94                         | 54                        | 1000                      | 547             | 153                       | 35                         | 37                        | 651                       |
| 22    | 3000            | 236                       | 121                        | 34                        | 910                       | 456             | 209                       | 34                         | 5                         | 789                       |
| 23    | 3000            | 548                       | 234                        | 64                        | 3000                      | 3000            | 245                       | 124                        | 23                        | 3000                      |
| 24    | 678             | 474                       | 123                        | 41                        | 548                       | 457             | 92                        | 47                         | 32                        | 687                       |
| 25    | 389             | 298                       | 105                        | 51                        | 254                       | 178             | 197                       | 87                         | 34                        | 154                       |
| 26    | 3000            | 958                       | 451                        | 154                       | 3000                      | 3000            | 754                       | 124                        | 75                        | 3000                      |
| 27    | 897             | 571                       | 297                        | 78                        | 578                       | 574             | 124                       | 35                         | 24                        | 989                       |
| 28    | 390             | 301                       | 293                        | 10                        | 450                       | 505             | 412                       | 71                         | 21                        | 674                       |
| 29    | 1000            | 854                       | 542                        | 101                       | 1000                      | 1000            | 540                       | 354                        | 40                        | 1000                      |
| 30    | 3000            | 901                       | 400                        | 124                       | 3000                      | 3000            | 897                       | 300                        | 89                        | 3000                      |

Reference values: A-TPO – antithyropoxidase antibody – negative when lower than 35 IU/mL; A-Tg - antithyroglobulin antibody - negative when lower than 40 IU/mL
